# Supplementary material for: Efficient Payload Compression in IP-based Wireless Sensor Network: Algorithmic Analysis and Implementation
Source: Hindawi journal article supplement (doi:10.1155/2019/9808321), 2019-12-28
Supplement: f1 [file 9808321.f1.pdf]

# Data Availability Report

## Introduction:

This data availability statement provide here is an explanation of everything used or needed for this research work, it goes from the pseudo code to the few sniped code of our implementation, we have organized it as follow: section 1, is all about our pseudo code; in section 2, we have enumerate the tools used in our work; section 3 show the installations process of those different tools used in our research ; section 4 shows the different sensors used for Structural Health Monitoring we used; and finally section 5, display few sniped codes of our implementation.

## Pseudo code of Implementation

a) Algorithm for compression at sensor node level.

### **Procedure** *Compressdata*

*ThresholdValue*  $\leftarrow$  maximum tolerated value during a natural disaster assigned to sensors  $\rightarrow$   
“if a senses value exceeds this value then we must take that into consideration”

*waitValue*  $\leftarrow$  amount of time to wait before sending the compressed value

### **While TRUE do**

*SensedData*  $\leftarrow$  sensing the environment

**If** *sensedData* is greater than *ThresholdValue* then

*collectedData*  $\leftarrow$  *sensedData*  $\rightarrow$  “add the sensed data to the collection of data that are greater than the threshold”

**end If**

**If** *startSensingTime* is greater or equal to *waitValue*

*compressedData*  $\leftarrow$  *ArithmeticEncoding*(*collectedData*)

*CompressdataSink* (*compressedData*)

**end If**

**end while**

**end Procedure**

A threshold value is to be set which is to be considered while sensing the environment; so, all the values bellow that value should be ignore by the sensors. Then, we set a *waitValue* too, which is the amount of time a sensor has to wait before transmitting data to the sink. At this time, we start sensing data; if the value sensed (*SensedData*) is greater than the threshold value; (*ThresholdValue*), we collect that value and store it in the variable containing the collection of values above the threshold value, and, we do check if the time the sensors is intended to wait before transmitting the data has

elapsed, if so, we pass that collection of values as argument to the *ArithmeticEncoding* method, and it return the compressed data (*compressedData*) which in turn is sent to the sink node by the use of *CompressdataSink* method that take the *compressedData* as argument.

b) Algorithm description of compression at sink node level

**Procedure** *CompressdataSink*(compressedDataFromSensors)

*sinkWaitingTimeValue*  $\leftarrow$  amount of time to wait before sending the compressed value to the terminal

*collectSensorsCompressedData*  $\leftarrow$  compressedDataFromSensors collect the data compressed by sensors nodes

**If** *startCollectingTime* is greater or equal to *sinkWaitingTimeValue*

*compressedSinkData*  $\leftarrow$  ArithmeticEncoding(*collectSensorsCompressedData*)

*sendToTerminal*(*compressedSinkData*)

**end If**

**end Procedure**

Here we start by setting a waiting time reference value (*sinkWaitingTimeValue*), which is the amount of time the sink need to wait before compressing the received value from the sink; then we store the data from sensors in a variable called *collectSensorsCompressedData*; then, we check if the time the sink is intended to wait before sending the data to the terminal has elapsed; if so, we pass that collection of value receive from the sensors to the Arithmetic Encoding in order to compress the data again, and then, we send that double compressed data to the terminal, by using *sendToTerminal* method with *compressedSinkData* as argument.

## A. Tools:

- Eclipse IDE
- TinyOs plugins
- Nesc( programming language)

## B. Installation:

Processes of installation of different tools used:

### ➤ Eclipse IDE:

Source: “<https://websiteforstudens.com/how-to-install-eclipse-oxygen-ide-on-ubuntu-167-04-17-10-18-04/>”

1. Install java: to do so,
  - a. Run the command bellow:

```
sudo add-apt-repository ppa:webupd8team/java
```

After running the above command, you should see a prompt to accept the PPA key onto Ubuntu. So accept and continue.

Now run the command below to download java 9 installer. This installer should install the latest Java JDK 9 on your Ubuntu machines.

```
sudo apt update
```

```
sudo apt install oracle-java8-installer
```

After running the above commands, you will be asked to access the license terms of the software. So accept and continue.

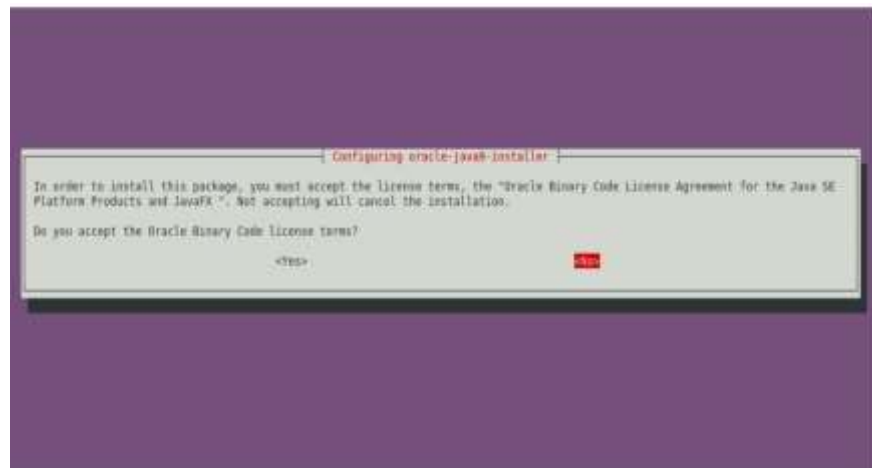

Set Oracle JDK8 as default, to do that, install the oracle-java8-set-default package. This will automatically set the JAVA environment Variable.

```
sudo apt- install oracle-java8-set-default
```

The above commands will automatically set java 9 as the default, and that should complete your installation, you can check your java version by running the following commands.

```
javac -version
```

- b. You can also go on the software center of Ubuntu to search and install OpenJDK java 7 or 8.

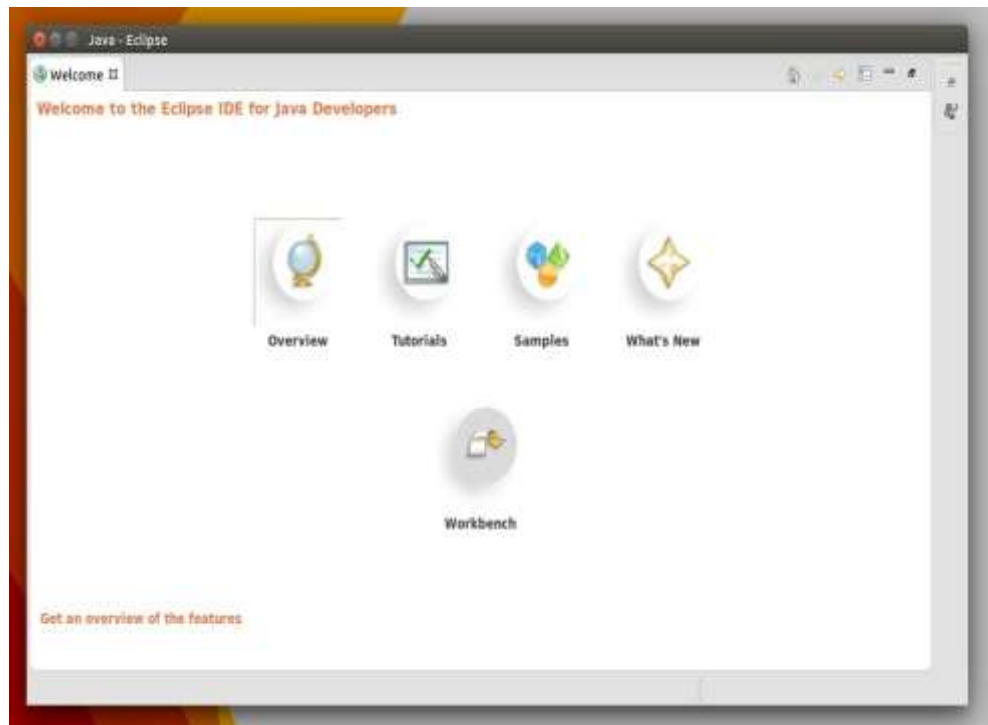

2. Download Eclipse from the official website according to your OS type whether it is a 32 or 64 bit version. (Go to Setting->Details->Overview).
3. Run the installer wizard: decompress the downloaded archive in your file browser and navigate to the result "eclipse-installer" folder, right-click on file eclipse-inst and select Run or go to file browser's Menu Edit->Preferences->Behavior-> check "Run executable text files when they are opened", and finally log out and back in (or run nautilus -q command on the terminal).

When the wizard launches, select install item, then installation folder, and finally click INSTALL button.

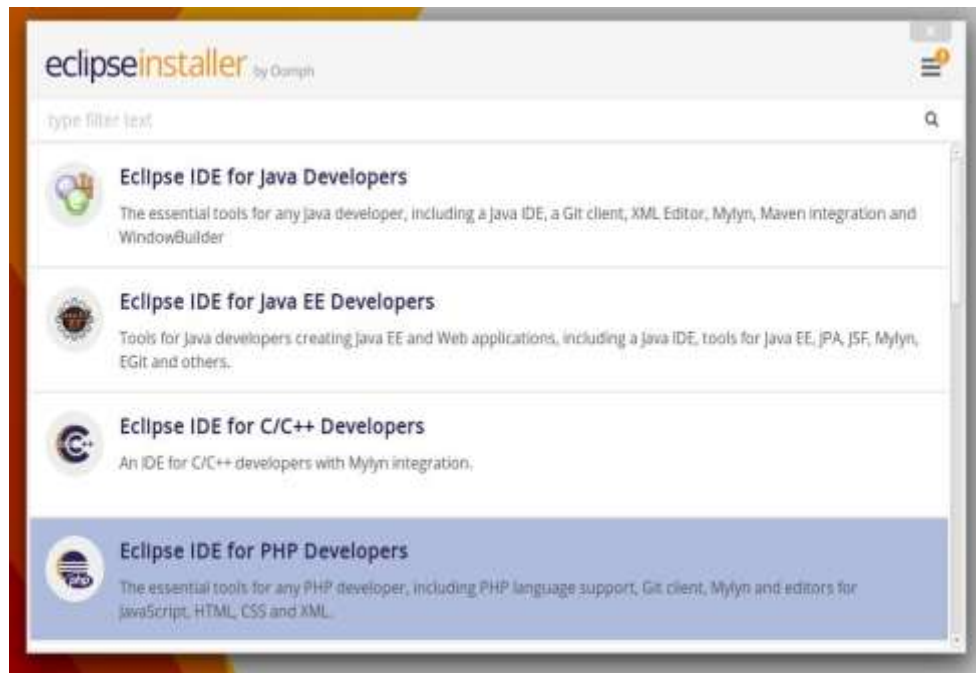

Use the onscreen instructions to complete the installer. (Accept the default installation directory and continue)

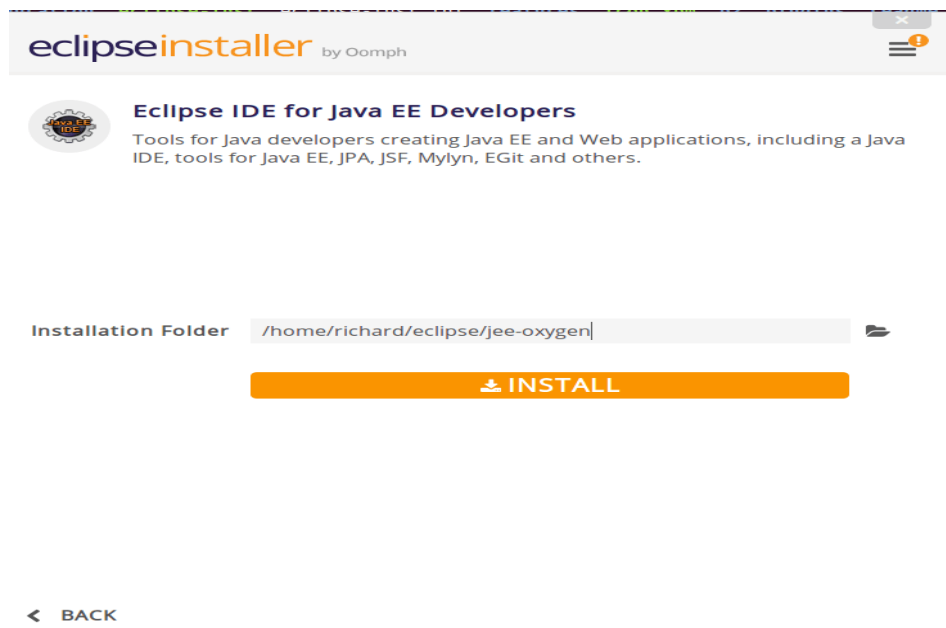

Next, accept the license terms and continue. (Wait for Eclipse installer to download and install all the packages.)

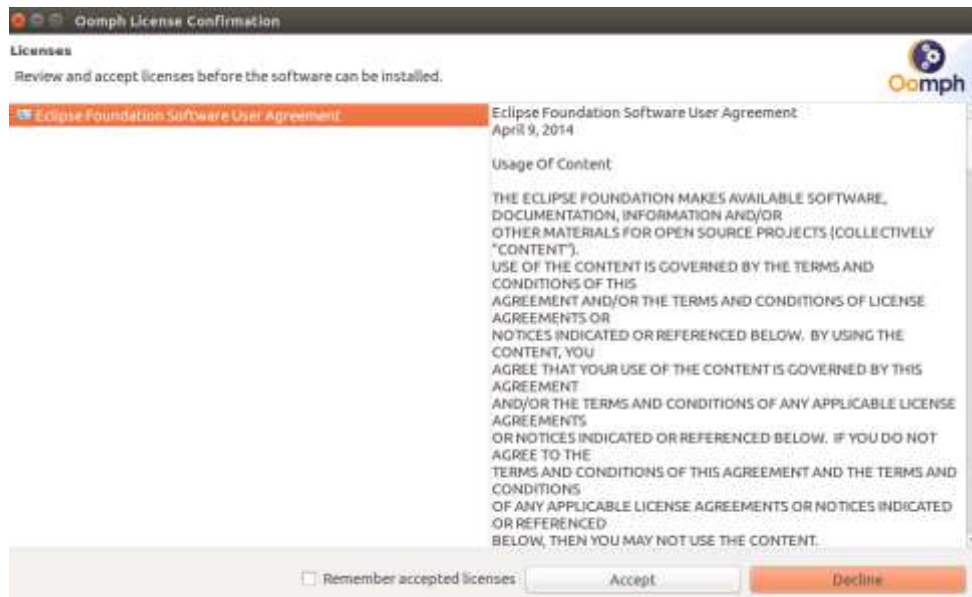

After downloading the installer should complete. (All you have to do is launch the program.)

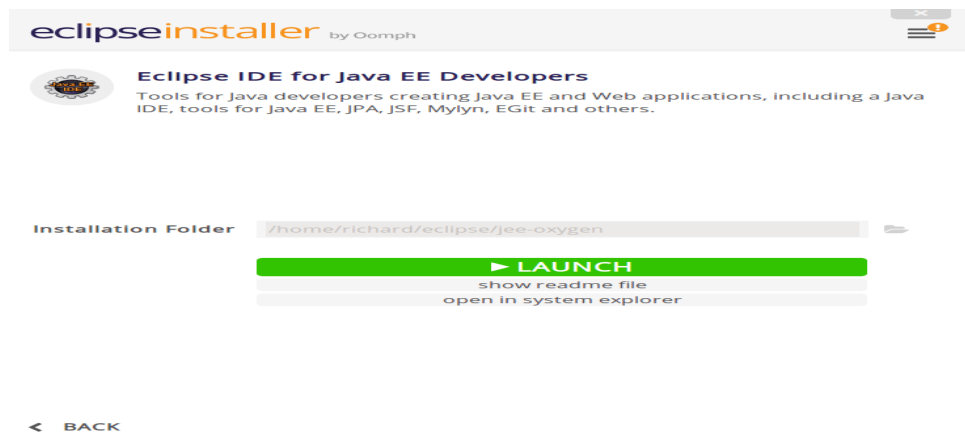

4. Create a launcher shortcut: open terminal via Ctrl+Alt+T shortcut key, then type the following:

```
gedit .local/share/application/eclipse.desktop
```

The command creates and opens a launcher file, for current user, with gedit text editor. When it opens, type the following

```
Name=Eclipse
Type=Application
Exec=/home/USERNAME/java-mars/eclipse/eclipse
Terminal=false
Icon=/home/USERNAME/java-mars/eclipse/icon.xpm
Comment=Integrated Development Environment
```

```
NoDisplay=false
```

```
Categories=Development; IDE;
```

```
Name[en]=Eclipse
```

Depending on your installation folder, check out in file browser, change the value in bold, and USERNAME is your personal directory.

➤ **TinyOS:**

Source: [www.tinyprod.net/repos/debian/](http://www.tinyprod.net/repos/debian/)

For the TinyOS 2.1.2 release, you should install tinyos-tools-14 (tinyos-tools). TinyOS releases prior to 2.1.2 are not supported.

Tinyos-tools and tinyos-tools-14 are incompatible with tinyos-tools-devel. You can only have one of these packages installed. You must remove tinyos-tools (tinyos-tools-14) prior to installing tinyos-tools-devel and vice-versa.

```
$ sudo
```

```
$ apt-get purge tinyos-tools
```

```
$ apt-get install tinyos-tools-devel
```

You may need to remove old \*-tinyos packages. To do so, follow these instructions:

- Remove previously install \*-tinyos packages:  
\$ sudo dpkg -P `dpkg -l nesc '\*tinyos\*' | grep ^ii | awk '{ print \$2}' | xargs`  
\$ sudo apt-get clean

To use these packages, follow these instructions:

- a) Tell apt about the TinyProd signing key.

```
$ wget -O - http://tinyprod.net/repos/debian/tinyprod.key | sudo apt-key add
```

Or..

```
$gpg --keyserver keyserver.ubuntu.com --recv-keys A9B913B9  
$gpg --a --export A9B913B9 | sudo apt-key add -
```

- b) Add the following lines to /etc/apt/sources.list.d/tinyprod-debian.list:

```
deb http://tinyprod.net/repos/debian wheezy main
```

```
deb http://tinyprod.net/repos/debian msp430-46 main
```

```
$ sudo -s
```

```
$ cd /etc/apt/sources.list.d
```

```
$ echo "deb http://tinyprod.net/repos/debian wheezy main" >>  
tinyprod-debian.list
```

```
$ echo "deb http://tinyprod.net/repos/debian msp430-46 main" >>  
tinyprod-debian.list
```

c) Install the new packages:

```
$ sudo apt-get update  
$ sudo apt-get install nesc tinyos-tools msp430-46 avr-tinyos.
```

NOTE: if you ever wanted to uninstall the package, run the following commands:

```
$ sudo apt-get autoremove --purge nesc tinyos-tools msp430-46 avr-tinyos
```

## C. Type of sensors used:

Based on what to measure different sensors are available:

- a. Strain Gauges (sometime referred to as Stain gage): is a sensor whose resistance varies with applied force; it converts force, pressure tension, weight, etc. into change in electrical resistance which can then be measured. When external forces are applied to stationary object, stress and stain are the result.
- b. Seismometers: is an instrument that measures motion of the ground, caused by, for example, an earthquake, a volcanic eruption, or the use of explosives. Record of seismic waves allow seismologist to map the interior of the earth and to locate and measure the size of events like these.
- c. Piezoelectric Accelerometers: is an accelerometer that employs the piezoelectric effect of certain materials to measure dynamic changes in mechanical variables (e.g, acceleration, vibration, and mechanical shock).
- d. Velocity Transducers/Sensor: consist of a moving coil suspended in the magnetic field of a permanent magnet. The velocity is given as the input, which causes the movement of the coil in the magnetic field. This causes an emf to be generated in the coil. This induced emf will be proportional to the input velocity and thus, is a measure of the velocity.
- e. Laser Displacement Sensors (LDS): the principle of “laser displacement sensor” ranging is a method where triangulation is applied by combining the emitting element and the position sensitive device (PSD) to perform ranging (detecting the amount of displacement).



- f. Fiber Optic Sensors: is a sensor that uses optical fiber either as the sensing element (“intrinsic sensors”), or as a means of relaying signals from a remote sensor to the electronics that process the signals (“extrinsic sensors”).
- g. Piezoelectric Sensors: is a device that uses the piezoelectric effect, to measure changes in pressure, acceleration, temperature, strain, or force by converting them to an electrical charge.
- h. Accelerometer sensors: is an electromechanical device used to measure acceleration forces. Such forces may be static, like the continuous force of gravity or, as is the case with many mobile devices, dynamic to sense movement or vibrations. Acceleration is the measurement of the change in velocity, or speed divided by time.

## **D. Implementation**

The implementation was done as follow.

- The make file: which consisted only of the rule that should be applied to the other file.
- A Header file: where the main structure of our code was written.
- The Module file: was the file that contains all the interfaces as well as most of the source code
- The Configuration file: this file contains the code necessary to wired all the components of our program together.

## C. Source Code snipped

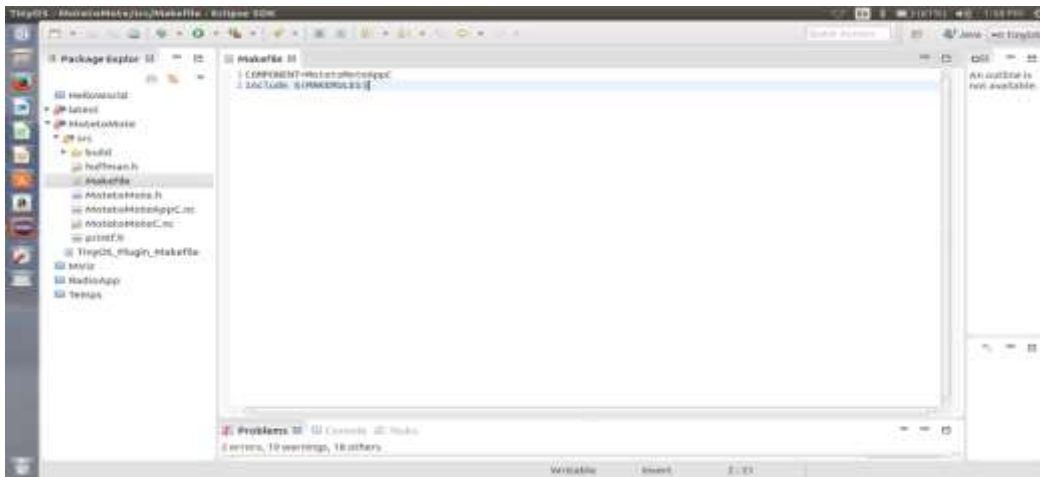

Fig1: figure of the make file source code

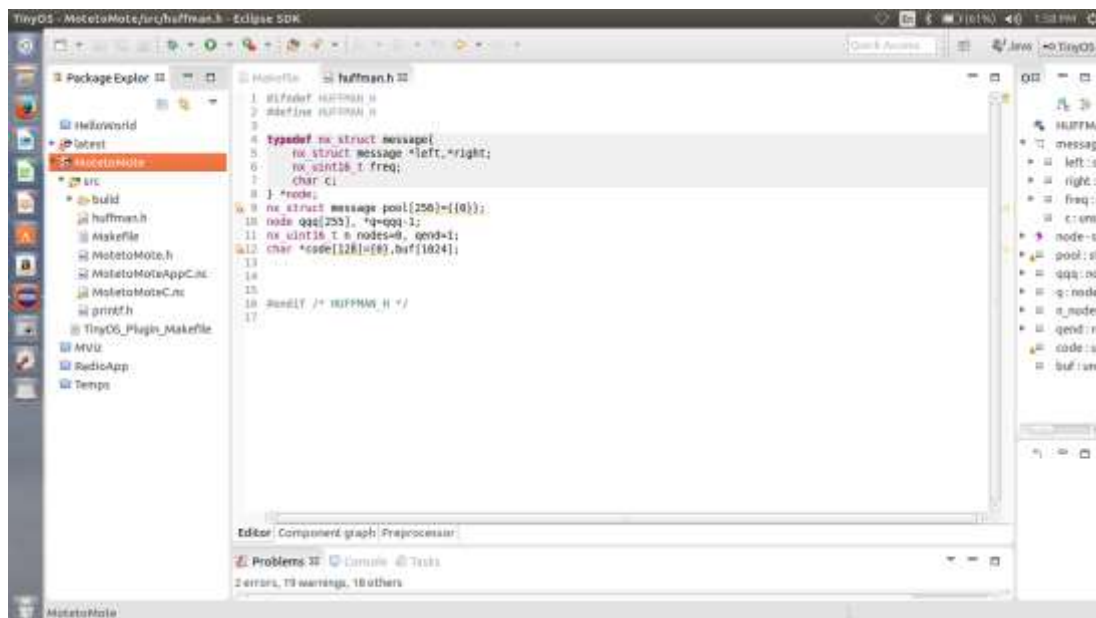

Fig2: snipped source code of the Huffman main structure

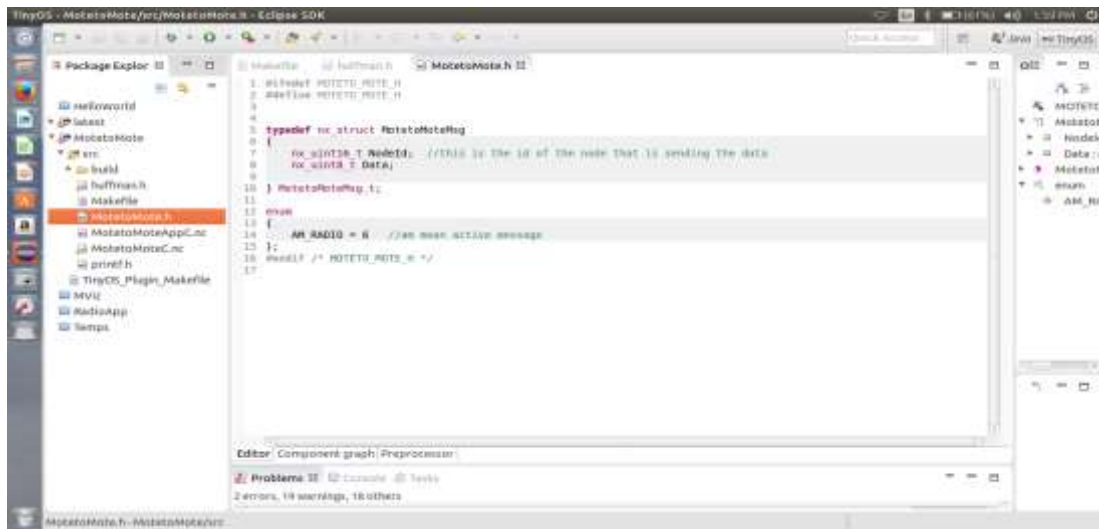

Fig3: snipped source code of the packet structure

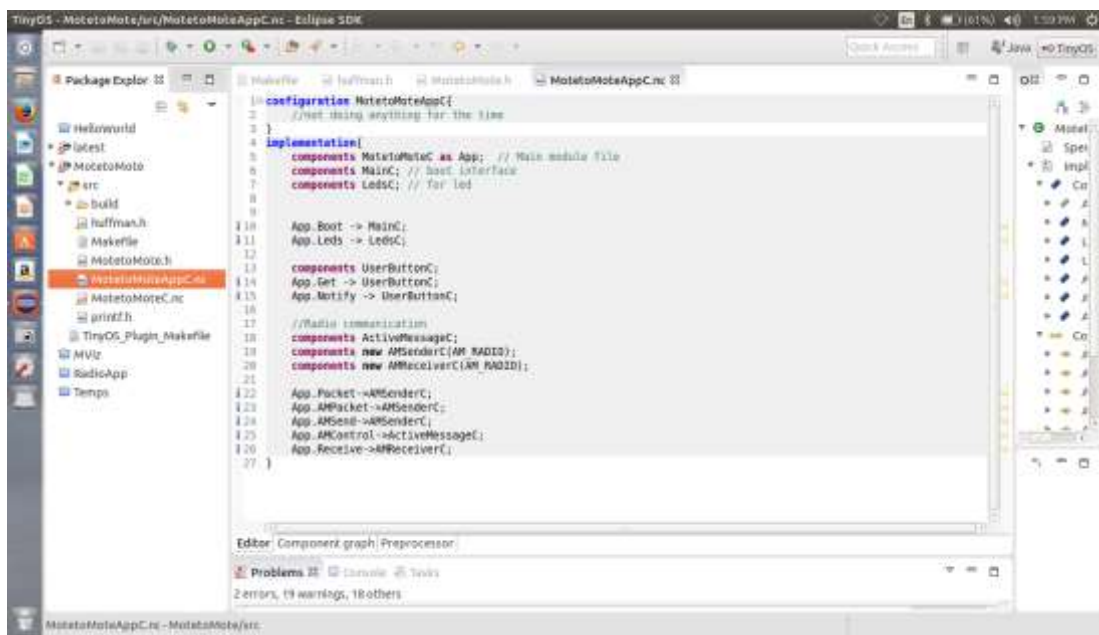

Fig3: snipped source code of the configuration file

```
Makefile huffman.h MotetoMote.h MotetoMoteAppC.nc MotetoMoteC.nc
1 #include<UserButton.h>
2 #include "MotetoMote.h"
3 #include "huffman.h"
4 #include "printf.h"
5 module MotetoMoteC
6 {
7
8     uses //general interfaces
9     {
10         interface Boot;
11         interface Leds;
12     }
13     uses //UserButton related interfaces
14     {
15         interface Get<button_state_t>;
16         interface Notify<button_state_t>;
17     }
18     uses //Radio
19     {
20         interface Packet; //interface that allows us to work with packets
21         interface AMPacket;
22         interface AMSend; //allows you to send active message
23         interface SplitControl as AMControl; //allows you to do some basic extraction on data
24         interface Receive; // allows us to receive either in the serial port or in the radio
25     }
26
27 }
28
29 }
```

```
Makefile huffman.h MotetoMote.h MotetoMoteAppC.nc MotetoMoteC.nc
30 implementation
31 {
32     //my global variables
33     bool _radioBusy =FALSE; //will store the status of the radio
34     message_t _packet;
35     event void Boot.booted()
36     {
37         call Notify.enable();
38         call AMControl.start(); //start the radio chip when the sensor boot
39     }
40
41
42     event void Notify.notify(button_state_t val)
43     {
44         if(_radioBusy == FALSE)
45         {
46             //creating the packet
47             MotetoMoteMsg_t* msg = call Packet.getPayload(&_packet, sizeof(MotetoMoteMsg_t)); //creating a pack
48             msg->NodeId = T05_NODE_ID;
49             msg->Data =(uint8_t) val;
50
51             //sending the packet
52             if(call AMSend.send(AM_BROADCAST_ADDR, &_packet, sizeof(MotetoMoteMsg_t))==SUCCESS)
53             {
54                 _radioBusy = TRUE;
55             }
56         }
57     }
58 }
59 }
```

```
Makefile  huffman.h  MotetoMote.h  MotetoMoteAppC.nc  MotetoMoteC.nc
60 event void AMSend.sendDone(message_t *msg, error_t error){
61     if(msg == &_packet)
62     {
63         _radioBusy =FALSE;
64     }
65 }
66
67 event void AMControl.startDone(error_t error){
68     if(error == SUCCESS)
69     {
70         call Leds.led00n();
71     }
72     else
73     {
74         call AMControl.start(); //will start this again
75     }
76 }
77
78
79 event void AMControl.stopDone(error_t error){
80     // TODO Auto-generated method stub
81 }
82
```

```
Makefile  huffman.h  MotetoMote.h  MotetoMoteAppC.nc  MotetoMoteC.nc
83 event message_t * Receive.receive(message_t *msg, void *payload, uint8_t len)
84 {
85     //to check if the packet received is yours
86     if(len == sizeof(MotetoMoteMsg_t))
87     {
88         MotetoMoteMsg_t* incomingPacket = (MotetoMoteMsg_t*) payload;
89         //incomingPacket->NodeId == 2;
90         uint8_t data = incomingPacket->Data;
91         if(data == 1) // means the user on the other end has press the button
92         {
93             call Leds.led20n();
94         }
95         if(data == 0)
96         {
97             call Leds.led20ff();
98         }
99     }
100     return msg;
101 }
102
103 node new_node(nx_uint16_t freq, char c, node a, node b)
104 {
105     node n = pool + n.nodes++;
106     if (freq) n->c = c, n->freq = freq;
107     else {
108         n->left = a, n->right = b;
109         n->freq = a->freq + b->freq;
110     }
111     return n;
112 }
113 /* priority queue */
```

```

1140 void qinsert(node n)
1141 {
1142     /* higher freq has lower priority
1143     move up lower freq */
1144     nx_uint16_t j, i = qend++;
1145     while ((j = i / 2) > 0) {
1146         /* compare freq of the new node with the parent's freq */
1147         if (q[j]->freq <= n->freq) break;
1148         q[i] = q[j], i = j;
1149     }
1150     q[i] = n;
1151 }
1152
1153 /* remove the top element(q[1]),
1154 and moving up other elements */
1155 node qremove()
1156 {
1157     nx_uint16_t i, l;
1158     node n = q[1];
1159
1160     if (qend < 2) return 0;
1161     qend--;
1162     while ((l = i * 2) < qend) {
1163         if (l + 1 < qend && q[l + 1]->freq < q[l]->freq) l++;
1164         q[i] = q[l], i = l;
1165     }
1166     q[i] = q[qend];
1167     return n;
1168 }
1169
1170 }

```

```

1171 /* walk the tree and put us and 22 */
1172 void build_code(node n, char *s, nx_uint16_t len)
1173 {
1174     static char *out = buf;
1175     if (n->c) {
1176         s[len] = 0;
1177         strcpy(out, s);
1178         code[n->c] = out;
1179         out += len + 1;
1180         return;
1181     }
1182     s[len] = '0'; build_code(n->left, s, len + 1);
1183     s[len] = '1'; build_code(n->right, s, len + 1);
1184 }
1185
1186 void init(const char *s)
1187 {
1188     nx_uint16_t i, freq[128] = {0};
1189     char c[16];
1190     /* count frequency for each character */
1191     while (*s) freq[(int)*s++]++;
1192     /* initial heap tree */
1193     for (i = 0; i < 128; i++) {
1194         if (freq[i]) qinsert(new_node(freq[i], i, 0, 0));
1195     }
1196
1197     while (qend > 2) {
1198         qinsert(new_node(0, 0, qremove(), qremove()));
1199     }
1200     build_code(q[1], c, 0);
1201 }

```

Fig4: snipped code of the module file

## Conclusion:

Within this document about our resources, we have given: the pseudo codes of our implementation follow by a clear explanations; then we have enumerate the tools used and then clearly explain how to install eclipse IDE (Integrated Development Environment), TinyOS on Ubuntu; after that we gave various type of sensors needed with their definitions and finally we gave some sniped code of our

implementation. After extrapolation we can assure the readers that using these resources it is clearly possible for them to replicate our work with a laborious efforts.
